# Supplementary material
Source: Springer Nature journal article supplement (https://www.springermedizin.de/resource/supplementary/13014_2009_232_MOESM3_ESM.pdf/9633230)

**A**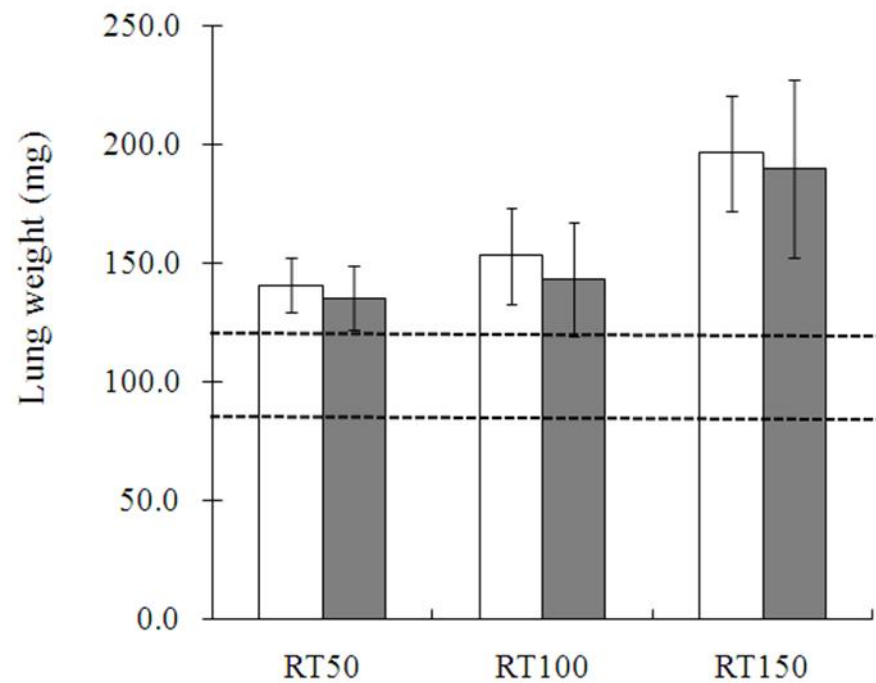**B**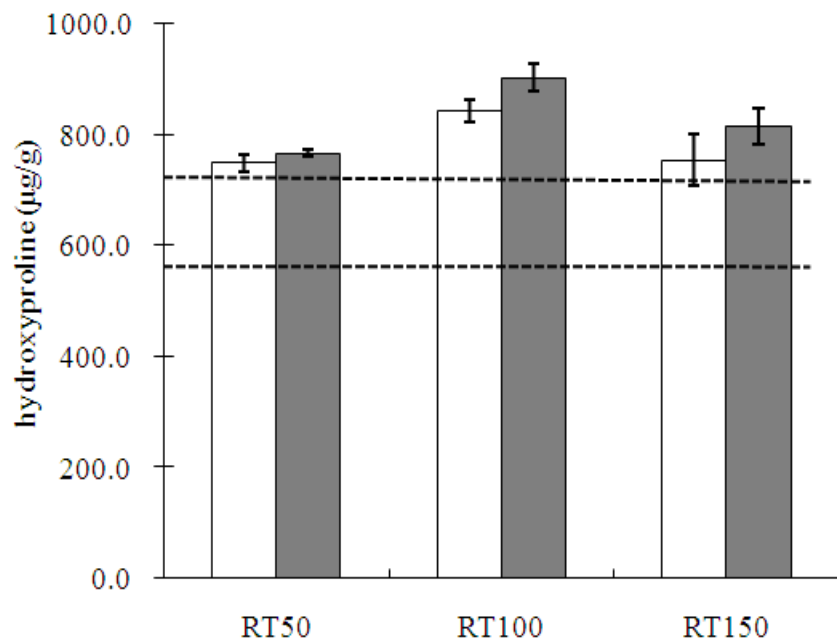

Supplement: MOESM3 [file 9633230]
